# Supplementary material for: HIV transmission dynamics and population-wide drug resistance in rural South Africa
Source: PubMed Central journal article supplement (PMC11059351; doi:10.1038/s41467-024-47254-z), 2024-04-29
Supplement: 41467_2024_47254_MOESM3_ESM.pdf [file 41467_2024_47254_MOESM3_ESM.pdf]

## Reporting Summary

Nature Portfolio wishes to improve the reproducibility of the work that we publish. This form provides structure for consistency and transparency in reporting. For further information on Nature Portfolio policies, see our [Editorial Policies](#) and the [Editorial Policy Checklist](#).

### Statistics

For all statistical analyses, confirm that the following items are present in the figure legend, table legend, main text, or Methods section.

- |                                     |                                                                                                                                                                                                                                                                                                |
|-------------------------------------|------------------------------------------------------------------------------------------------------------------------------------------------------------------------------------------------------------------------------------------------------------------------------------------------|
| n/a                                 | Confirmed                                                                                                                                                                                                                                                                                      |
| <input checked="" type="checkbox"/> | <input checked="" type="checkbox"/> The exact sample size ( $n$ ) for each experimental group/condition, given as a discrete number and unit of measurement                                                                                                                                    |
| <input checked="" type="checkbox"/> | <input type="checkbox"/> A statement on whether measurements were taken from distinct samples or whether the same sample was measured repeatedly                                                                                                                                               |
| <input checked="" type="checkbox"/> | <input type="checkbox"/> The statistical test(s) used AND whether they are one- or two-sided<br><i>Only common tests should be described solely by name; describe more complex techniques in the Methods section.</i>                                                                          |
| <input checked="" type="checkbox"/> | <input type="checkbox"/> A description of all covariates tested                                                                                                                                                                                                                                |
| <input checked="" type="checkbox"/> | <input type="checkbox"/> A description of any assumptions or corrections, such as tests of normality and adjustment for multiple comparisons                                                                                                                                                   |
| <input type="checkbox"/>            | <input checked="" type="checkbox"/> A full description of the statistical parameters including central tendency (e.g. means) or other basic estimates (e.g. regression coefficient) AND variation (e.g. standard deviation) or associated estimates of uncertainty (e.g. confidence intervals) |
| <input checked="" type="checkbox"/> | <input type="checkbox"/> For null hypothesis testing, the test statistic (e.g. $F$ , $t$ , $r$ ) with confidence intervals, effect sizes, degrees of freedom and $P$ value noted<br><i>Give <math>P</math> values as exact values whenever suitable.</i>                                       |
| <input checked="" type="checkbox"/> | <input type="checkbox"/> For Bayesian analysis, information on the choice of priors and Markov chain Monte Carlo settings                                                                                                                                                                      |
| <input checked="" type="checkbox"/> | <input type="checkbox"/> For hierarchical and complex designs, identification of the appropriate level for tests and full reporting of outcomes                                                                                                                                                |
| <input checked="" type="checkbox"/> | <input type="checkbox"/> Estimates of effect sizes (e.g. Cohen's $d$ , Pearson's $r$ ), indicating how they were calculated                                                                                                                                                                    |

*Our web collection on [statistics for biologists](#) contains articles on many of the points above.*

### Software and code

Policy information about [availability of computer code](#)

|                 |                                                                                                                                                                                                                                                                                                                                                                                                                                                                                                                                                                                                                                                                                                                                                                      |
|-----------------|----------------------------------------------------------------------------------------------------------------------------------------------------------------------------------------------------------------------------------------------------------------------------------------------------------------------------------------------------------------------------------------------------------------------------------------------------------------------------------------------------------------------------------------------------------------------------------------------------------------------------------------------------------------------------------------------------------------------------------------------------------------------|
| Data collection | Microsoft Excel 356 v16.79<br>Rstudio v2023.09.1+494<br>Python 3.10<br>ArcGIS Pro 3.1                                                                                                                                                                                                                                                                                                                                                                                                                                                                                                                                                                                                                                                                                |
| Data analysis   | Custom python and Rscripts were used to produced Figures 2,3, supplementary figure 1 -5 ( <a href="https://github.com/SteveKemp/Vukuzazi_manuscript">https://github.com/SteveKemp/Vukuzazi_manuscript</a> )<br>IQTREE v2.2.5 was used to infer phylogenies in figures 4 and supplementary figure 6.<br>Clusterpicker v1.2.5 was used to infer clusters for figures 4 and supplementary figure 6<br>Drawio was used to produce the flowchart in Figure 1<br>Phyloscanner v1.82 was used to infer transmissions between participants ( <a href="https://github.com/BDI-pathogens/phyloscanner">https://github.com/BDI-pathogens/phyloscanner</a> )<br>ArcGIS Pro 3.1 was used to construct the grid and generate the spatial data visualisations included in figure 5. |

For manuscripts utilizing custom algorithms or software that are central to the research but not yet described in published literature, software must be made available to editors and reviewers. We strongly encourage code deposition in a community repository (e.g. GitHub). See the Nature Portfolio [guidelines for submitting code & software](#) for further information.

## Data

Policy information about [availability of data](#)

All manuscripts must include a [data availability statement](#). This statement should provide the following information, where applicable:

- Accession codes, unique identifiers, or web links for publicly available datasets
- A description of any restrictions on data availability
- For clinical datasets or third party data, please ensure that the statement adheres to our [policy](#)

Due to the potential for stigma and identifiable information involved in potential transmission clusters, accession numbers for these participants are purposefully redacted.

Sequencing data for the entire Vukuzazi/PANGEA cohort are available for download from GenBank, Accession: PRJEB19239 ID: 369369

## Research involving human participants, their data, or biological material

Policy information about studies with [human participants or human data](#). See also policy information about [sex, gender \(identity/presentation\), and sexual orientation](#) and [race, ethnicity and racism](#).

|                                                                    |                                                                                                                                                                                                                                                                                                               |
|--------------------------------------------------------------------|---------------------------------------------------------------------------------------------------------------------------------------------------------------------------------------------------------------------------------------------------------------------------------------------------------------|
| Reporting on sex and gender                                        | In table 1, participants are disaggregated into sex, either male or female.                                                                                                                                                                                                                                   |
| Reporting on race, ethnicity, or other socially relevant groupings | No further disaggregation on race, ethnicity or other socially relevant groupings were made in this study.                                                                                                                                                                                                    |
| Population characteristics                                         | <p>The population was divided into age categories as follows:</p> <p>15-24<br/>25-34<br/>35-44<br/>45-54<br/>&gt;55</p> <p>The population was also segregated into into ART-naive (n=467) or ART-experienced (n=583). Known ART regimens are also present in the results</p>                                  |
| Recruitment                                                        | All eligible participants from the uMkhanyakude district were invited to participate in this cross-sectional study (n=36,097). Of these, 18041 were enrolled and participated in the study.                                                                                                                   |
| Ethics oversight                                                   | Ethical clearances were obtained from the University of KwaZulu-Natal Biomedical Research Ethics Committee, the London School of Hygiene & Tropical Medicine Ethics Committee, and the Partners Institutional Review Boards. All participants provided informed consent for HIV testing and ensuing analysis. |

Note that full information on the approval of the study protocol must also be provided in the manuscript.

## Field-specific reporting

Please select the one below that is the best fit for your research. If you are not sure, read the appropriate sections before making your selection.

- Life sciences       Behavioural & social sciences       Ecological, evolutionary & environmental sciences

For a reference copy of the document with all sections, see [nature.com/documents/nr-reporting-summary-flat.pdf](https://nature.com/documents/nr-reporting-summary-flat.pdf)

## Life sciences study design

All studies must disclose on these points even when the disclosure is negative.

|                 |                                                                                                                                                                                                                                                                                                                                                                                                                                                                                   |
|-----------------|-----------------------------------------------------------------------------------------------------------------------------------------------------------------------------------------------------------------------------------------------------------------------------------------------------------------------------------------------------------------------------------------------------------------------------------------------------------------------------------|
| Sample size     | All eligible participants from the uMkhanyakude district were invited to participate in this cross-sectional study (n=36,097). Of these, 18041 agreed to participate and were enrolled and participated in the study. No sample size calculation was performed, as this was intended to be an all-encompassing health survey of the entire district.<br>Following recruitment, n=6093 participants had a positive HIV ELISA.<br>Sequencing data was available for n=1050 genomes. |
| Data exclusions | 135 samples were excluded due to poor amplification of HIV RNA.<br>47 genomes were excluded due to poor quality control following RNA amplification.                                                                                                                                                                                                                                                                                                                              |
| Replication     | No replicates were possible due to fixed sequencing data.                                                                                                                                                                                                                                                                                                                                                                                                                         |
| Randomization   | No randomization took place - participants were in one of two fixed categories: ART-naive or ART-experienced                                                                                                                                                                                                                                                                                                                                                                      |
| Blinding        | To determine patterns between ART-naive and ART-experienced participants, no blinding took place in this study. Each participant was                                                                                                                                                                                                                                                                                                                                              |

# Reporting for specific materials, systems and methods

We require information from authors about some types of materials, experimental systems and methods used in many studies. Here, indicate whether each material, system or method listed is relevant to your study. If you are not sure if a list item applies to your research, read the appropriate section before selecting a response.

## Materials & experimental systems

## Methods

- n/a Involved in the study
- Antibodies
  - Eukaryotic cell lines
  - Palaeontology and archaeology
  - Animals and other organisms
  - Clinical data
  - Dual use research of concern
  - Plants

- n/a Involved in the study
- ChIP-seq
  - Flow cytometry
  - MRI-based neuroimaging

## Clinical data

Policy information about [clinical studies](#)

All manuscripts should comply with the ICMJE [guidelines for publication of clinical research](#) and a completed [CONSORT checklist](#) must be included with all submissions.

|                             |                                                                                                                                                                                       |
|-----------------------------|---------------------------------------------------------------------------------------------------------------------------------------------------------------------------------------|
| Clinical trial registration | N/A                                                                                                                                                                                   |
| Study protocol              | <a href="https://www.thelancet.com/journals/langlo/article/PIIS2214-109X(21)00176-5/fulltext">https://www.thelancet.com/journals/langlo/article/PIIS2214-109X(21)00176-5/fulltext</a> |
| Data collection             | Recruitment was from May 25, 2018 - Nov 28, 2019                                                                                                                                      |
| Outcomes                    | N/A                                                                                                                                                                                   |

## Plants

|                       |                                                                                                                                                                                                                                                                                                                                                                                                                                                                                                                                                          |
|-----------------------|----------------------------------------------------------------------------------------------------------------------------------------------------------------------------------------------------------------------------------------------------------------------------------------------------------------------------------------------------------------------------------------------------------------------------------------------------------------------------------------------------------------------------------------------------------|
| Seed stocks           | <i>Report on the source of all seed stocks or other plant material used. If applicable, state the seed stock centre and catalogue number. If plant specimens were collected from the field, describe the collection location, date and sampling procedures.</i>                                                                                                                                                                                                                                                                                          |
| Novel plant genotypes | <i>Describe the methods by which all novel plant genotypes were produced. This includes those generated by transgenic approaches, gene editing, chemical/radiation-based mutagenesis and hybridization. For transgenic lines, describe the transformation method, the number of independent lines analyzed and the generation upon which experiments were performed. For gene-edited lines, describe the editor used, the endogenous sequence targeted for editing, the targeting guide RNA sequence (if applicable) and how the editor was applied.</i> |
| Authentication        | <i>Describe any authentication procedures for each seed stock used or novel genotype generated. Describe any experiments used to assess the effect of a mutation and, where applicable, how potential secondary effects (e.g. second site T-DNA insertions, mosaicism, off-target gene editing) were examined.</i>                                                                                                                                                                                                                                       |
